# Supplementary material
Source: PubMed Central journal article supplement (PMC9874791)
Supplement: EAT-56-80-s001.pdf [file EAT-56-80-s001.pdf]

## Longer-term impact of COVID-19 among individuals with self-reported eating disorders in the United States, the Netherlands, and Sweden

### Supplementary Material

Termorshuizen et al., 2022

|                         |                                                                                                            |
|-------------------------|------------------------------------------------------------------------------------------------------------|
| Supplementary Table 1.  | Size of surveys at each time point                                                                         |
| Supplementary Table 2.  | Attrition analysis results                                                                                 |
| Supplementary Table 3.  | Descriptive statistics of COVID-19 exposure and experience at T1 and T2, and vaccination information at T2 |
| Supplementary Table 4.  | Descriptive statistics for group 1 (lingering or ill at T1) and group 1a (ill at T1 and T2)                |
| Supplementary Figure 1. | COVID-19-related impact on eating disorder symptoms at both time points (group 1)                          |
| Supplementary Figure 2. | Change in treatment access and quality since the start of the pandemic                                     |
| Supplementary Figure 3. | Changes in anxiety and depressive mood since the start of the pandemic reported at T2                      |
| Appendix I.             | A comprehensive list of all survey items across countries and time points                                  |

**Supplementary Table 1.** Size of surveys at each time point.

| Time point    | United States |                            | Netherlands |                            | Sweden   |                            |
|---------------|---------------|----------------------------|-------------|----------------------------|----------|----------------------------|
|               | <i>n</i>      | % of Baseline Participants | <i>n</i>    | % of Baseline Participants | <i>n</i> | % of Baseline Participants |
| Baseline (T1) | 510           | 100                        | 510         | 100                        | 982      | 100                        |
| Month 1       | 359           | 70                         | 236         | 46                         | --       | --                         |
| Month 2       | 296           | 58                         | 167         | 33                         | --       | --                         |
| Month 3       | 247           | 48                         | 144         | 28                         | --       | --                         |
| Month 4       | 129           | 25                         | 125         | 25                         | --       | --                         |
| Month 5       | 115           | 23                         | 102         | 20                         | --       | --                         |
| Month 6       | 103           | 20                         | 122         | 24                         | 646      | 66                         |
| Month 7       | 97            | 19                         | 123         | 24                         | --       | --                         |
| Month 8       | 98            | 19                         | 110         | 22                         | --       | --                         |
| Month 9       | 106           | 21                         | 103         | 20                         | --       | --                         |
| Month 10      | 96            | 19                         | 98          | 19                         | --       | --                         |
| Month 11      | 76            | 15                         | 82          | 16                         | --       | --                         |
| Month 12      | --            | --                         | 85          | 17                         | --       | --                         |
| Month 13 (T2) | 132           | 26                         | 219         | 43                         | 634      | 65                         |

*Note.* The US study evaluated baseline plus 12 months of follow-up. In the Netherlands, baseline plus 13 months were evaluated. In Sweden, three time points were evaluated (baseline, 6-month follow-up, and 1-year follow-up).

**Supplementary Table 2.** Attrition analysis results

|                                                            | Participants <i>n</i> (%)             |                            |                                   |                            |                                        |                            |
|------------------------------------------------------------|---------------------------------------|----------------------------|-----------------------------------|----------------------------|----------------------------------------|----------------------------|
|                                                            | United States<br><i>N</i> = 510       |                            | Netherlands<br><i>N</i> = 510     |                            | Sweden<br><i>N</i> = 982               |                            |
|                                                            | T2 responders<br>132 (26)             | Non-responders<br>378 (74) | T2 responders<br>219 (43)         | Non-responders<br>291 (57) | T2 responders<br>702 (72)              | Non-responders<br>280 (29) |
| <b><i>N</i> (%)</b>                                        |                                       |                            |                                   |                            |                                        |                            |
| <b>Age</b> , mean ± SD                                     | 32.1 ± 10.4                           | 30.0 ± 8.9                 | --                                | --                         | 32.2 ± 9.2                             | 33.3 ± 8.6                 |
| 16-21 years                                                | 12 (9)                                | 51 (14)                    | 50 (23)                           | 77 (26)                    | 22 (3)                                 | 19 (7)                     |
| 22-29 years                                                | 60 (45)                               | 170 (45)                   | 96 (44)                           | 123 (42)                   | 258 (37)                               | 108 (39)                   |
| 30-39 years                                                | 29 (22)                               | 104 (28)                   | 48 (22)                           | 63 (22)                    | 274 (39)                               | 107 (38)                   |
| 40-49 years                                                | 20 (15)                               | 36 (10)                    | 10 (5)                            | 17 (6)                     | 119 (17)                               | 36 (13)                    |
| 50+ years                                                  | 10 (8)                                | 17 (5)                     | 15 (7)                            | 11 (4)                     | 29 (4)                                 | 10 (4)                     |
| Age test statistics*                                       | <b>t(510) = -2.0, <i>p</i> = 0.04</b> |                            | $\chi^2(4, 510) = 3.4, p = 0.5$   |                            | <b>W(982) = 89672, <i>p</i> = 0.03</b> |                            |
| <b>Gender identity</b>                                     |                                       |                            |                                   |                            |                                        |                            |
| Female                                                     | 130 (98)                              | 353 (93)                   | 213 (97)                          | 285 (98)                   | 685 (98)                               | 269 (96)                   |
| Male                                                       | <5 (<5)                               | 11 (3)                     | 6 (3)                             | <5 (<5)                    | 12 (2)                                 | 6 (3)                      |
| Other                                                      | 0                                     | 14 (4)                     | 0                                 | <5 (<5)                    | 5 (1)                                  | 5 (2)                      |
| Gender test statistics                                     | Fisher's exact test, <i>p</i> = 1     |                            | Fisher's exact: <i>p</i> = 0.2    |                            | Fisher's exact: <i>p</i> = 0.2         |                            |
| <b>Diagnostic distribution**</b>                           |                                       |                            |                                   |                            |                                        |                            |
| Anorexia nervosa                                           | 88 (67)                               | 226 (60)                   | 147 (67)                          | 200 (69)                   | 455 (65)                               | 177 (63)                   |
| Bulimia nervosa                                            | 40 (30)                               | 136 (36)                   | 43 (20)                           | 74 (25)                    | 254 (36)                               | 107 (38)                   |
| Binge-eating disorder                                      | 30 (23)                               | 125 (33)                   | 20 (9)                            | 40 (14)                    | 161 (23)                               | 71 (25)                    |
| Other                                                      | 80 (61)                               | 238 (63)                   | 96 (44)                           | 110 (38)                   | 306 (44)                               | 114 (41)                   |
| ED dx test statistics                                      | Fisher's exact test, <i>p</i> = 1     |                            | Fisher's exact test, <i>p</i> = 1 |                            | Fisher's exact test, <i>p</i> = 1      |                            |
| <b>Illness status</b>                                      |                                       |                            |                                   |                            |                                        |                            |
| No symptoms                                                | 6 (5)                                 | 27 (7)                     | 21 (10)                           | 21 (7)                     | 245 (35)                               | 95 (34)                    |
| Lingering symptoms                                         | 59 (45)                               | 198 (53)                   | 65 (30)                           | 104 (36)                   | 344 (49)                               | 142 (51)                   |
| Currently ill                                              | 67 (51)                               | 153 (40)                   | 133 (61)                          | 166 (57)                   | 113 (16)                               | 43 (15)                    |
| Illness status test statistics                             | $\chi^2(2, 510) = 4.6, p = 0.1$       |                            | $\chi^2(2, 510) = 2.6, p = 0.3$   |                            | $\chi^2(2, 982) = 0.2, p = 0.9$        |                            |
| <b>ED symptoms at T1,</b><br>% frequently or daily or more |                                       |                            |                                   |                            |                                        |                            |

|                                          |                                                           |                |                                    |                                    |                                  |                                  |
|------------------------------------------|-----------------------------------------------------------|----------------|------------------------------------|------------------------------------|----------------------------------|----------------------------------|
| Binge eating                             | 18 (14)                                                   | 100 (26)       | 29 (13)                            | 39 (14)                            | 52 (7)                           | 26 (10)                          |
| Intake restriction                       | 62 (47)                                                   | 181 (48)       | 90 (41)                            | 104 (38)                           | 83 (12)                          | 42 (15)                          |
| Compensatory behaviors                   | 53 (40)                                                   | 123 (33)       | 80 (37)                            | 107 (39)                           | 57 (8)                           | 28 (10)                          |
| Anxiety related to exercise              | 77 (58)                                                   | 211 (56)       | --                                 | --                                 | 207 (30)                         | 85 (31)                          |
| ED sx test statistics                    | Fisher's exact test, $p = 1$                              |                | $\chi^2(4, 510) = 6, p = 0.2$      |                                    | $\chi^2(9, 982) = 12, p = 0.2$   |                                  |
| <b>Treatment status at T1</b>            |                                                           |                |                                    |                                    |                                  |                                  |
| Face-to-face                             | 5 (4)                                                     | 9 (2)          | 10 (5)                             | 18 (7)                             | 48 (7)                           | 9 (3)                            |
| Online                                   | 73 (55)                                                   | 157 (42)       | 99 (46)                            | 108 (40)                           | 20 (3)                           | 7 (3)                            |
| No engagement                            | 11 (8)                                                    | 20 (5)         | 9 (5)                              | 15 (6)                             | 15 (2)                           | 8 (3)                            |
| No treatment                             | 43 (33)                                                   | 185 (49)       | 99 (46)                            | 130 (48)                           | 616 (88)                         | 249 (91)                         |
| Tx status test statistics                | Fisher's exact test, $p = 1$                              |                | $\chi^2(3, 510) = 2, p = 0.5$      |                                    | $\chi^2(3, 982) = 5.6, p = 0.1$  |                                  |
| <b>GAD-7 at T1, total <math>n</math></b> |                                                           |                |                                    |                                    |                                  |                                  |
| mean $\pm$ SD                            | 10.5 $\pm$ 6.0                                            | 12.8 $\pm$ 5.6 | 208 (11 missing)<br>11.5 $\pm$ 5.5 | 261 (32 missing)<br>12.1 $\pm$ 5.3 | 695 (7 missing)<br>9.4 $\pm$ 5.7 | 273 (7 missing)<br>9.6 $\pm$ 5.5 |
| GAD-7 test statistics*                   | <b><math>t(510) = -3.8, p = 1.7 \times 10^{-4}</math></b> |                | $W(467) = 28349, p = 0.3$          |                                    | $W(968) = 97582, p = 0.5$        |                                  |
| <b>Anxiety levels changed since 2019</b> |                                                           |                |                                    |                                    |                                  |                                  |
| No                                       | 132                                                       | 378            | 219                                | 289 (2 missing)                    | 702                              | 280                              |
| Yes – Increased                          | 12 (9)                                                    | 57 (15)        | 64 (29)                            | 80                                 | 274 (39)                         | 111 (40)                         |
| Yes – Decreased                          | 108 (82)                                                  | 305 (81)       | 136 (62)                           | 192                                | 327 (47)                         | 128 (46)                         |
| Yes – Decreased                          | 12 (9)                                                    | 16 (4)         | 19 (9)                             | 17                                 | 101 (14)                         | 41 (15)                          |
| Anxiety test statistics                  | $\chi^2(2, 510) = 3, p = 0.2$                             |                | $\chi^2(2, 508) = 1.8, p = 0.4$    |                                    | $\chi^2(2, 982) = 0.06, p = 1.0$ |                                  |

*Note:* Bolded test statistics represent group differences with  $p < 0.05$ . "--": Age was assessed in categories in NL, thus, mean and SD is not available.

\*Wilcoxon Rank-Sum test was used if variables were not normally distributed. \*\*This can add to over 100% per country as individuals could indicate the presence of multiple EDs.

Abbreviations: SD, standard deviation; ED, eating disorder; dx, diagnosis; sx, symptoms; tx, treatment.

**Supplementary Table 3.** Descriptive statistics of additional sociodemographics, COVID-19 exposure, and -experience

|                                                                         | Participants <i>n</i> (%) |          |             |          |         |          |
|-------------------------------------------------------------------------|---------------------------|----------|-------------|----------|---------|----------|
|                                                                         | United States             |          | Netherlands |          | Sweden  |          |
|                                                                         | T1                        | T2       | T1          | T2       | T1      | T2       |
| <b>Race<sup>*,**</sup> <i>N</i></b>                                     | --                        | 132      | --          | --       | --      | --       |
| Asian                                                                   |                           | <5 (<5)  |             |          |         |          |
| Black or African American                                               |                           | 0        |             |          |         |          |
| Native American or Alaska Native                                        |                           | 0        |             |          |         |          |
| Native Hawaiian or Pacific Islander                                     |                           | <5 (<5)  |             |          |         |          |
| White                                                                   |                           | 124 (94) |             |          |         |          |
| More than one race                                                      |                           | <5 (<5)  |             |          |         |          |
| Other                                                                   |                           | <5 (<5)  |             |          |         |          |
| <b>Ethnicity<sup>*,**</sup> <i>N</i></b>                                | --                        | 128      | --          | --       | --      | --       |
| Hispanic                                                                |                           | 7 (5)    |             |          |         |          |
| Non-Hispanic                                                            |                           | 121 (92) |             |          |         |          |
| <b>Health insurance<sup>*,**</sup> <i>N</i></b>                         | --                        | 132      | --          | --       | --      | --       |
| Currently having health insurance                                       |                           | 124 (94) |             |          |         |          |
| Changed but still have coverage                                         |                           | 19 (14)  |             |          |         |          |
| Lost health insurance and currently uninsured                           |                           | <5 (<5)  |             |          |         |          |
| No change                                                               |                           | 111 (84) |             |          |         |          |
| <b>COVID-19</b>                                                         |                           |          |             |          |         |          |
| <b>Exposure to COVID-19 – professional contact<sup>*</sup> <i>N</i></b> | --                        | 132      | --          | 219      | --      | 702      |
| Front-line healthcare worker                                            |                           | 23 (17)  |             | 13 (6)   |         | 71 (10)  |
| Unable to work from home                                                |                           | 20 (15)  |             | 44 (20)  |         | 160 (23) |
| No exposure to COVID-19 during work                                     |                           | 86 (65)  |             | 145 (66) |         | 466 (67) |
| <b>Exposure to COVID-19 – general <i>N</i></b>                          | 132                       | 132      | 219         | 219      | 702     | 702      |
| Exposed to someone likely to have had COVID-19                          | 12 (9)                    | 8 (6)    | 21 (10)     | 19 (9)   | 88 (13) | 111 (16) |
| Member of household diagnosed with COVID-19                             | 9 (7)                     | 11 (8)   | <5 (<5)     | 22 (14)  | 5 (1)   | 407 (59) |
| Family member died from COVID-19 <sup>*</sup>                           | --                        | 9 (7)    | --          |          | --      | 25 (4)   |
| Friend died from COVID-19 <sup>*</sup>                                  | --                        | 7 (5)    | --          | 24 (11)  | --      | 7 (1)    |

Note: Some items were only available in T2 (\*), and some items were only available in US (\*\*).

**Supplementary Table 4.** Descriptive statistics for group 1 (lingering or ill at T1) and group 1a (ill at T1 and T2)

|                                 | Participants <i>n</i> (%) |           |             |           |             |           |           |           |            |           |            |           |
|---------------------------------|---------------------------|-----------|-------------|-----------|-------------|-----------|-----------|-----------|------------|-----------|------------|-----------|
|                                 | United States             |           |             |           | Netherlands |           |           |           | Sweden     |           |            |           |
|                                 | Group 1                   |           | Group 1a    |           | Group 1     |           | Group 1a  |           | Group 1    |           | Group 1a   |           |
| <b>N</b>                        | 121 (92)                  |           | 49 (37)     |           | 198 (90)    |           | 89 (41)   |           | 457 (65)   |           | 80 (11)    |           |
| <b>Age, mean ± SD</b>           | 32.7 ± 10.5               |           | 34.7 ± 10.5 |           | --          |           | --        |           | 33.8 ± 9.2 |           | 36.6 ± 9.6 |           |
| 16-21 years                     | 10 (8)                    |           | <5 (<5)     |           | 45 (23)     |           | 20 (22)   |           | 19 (4)     |           | <5 (<5)    |           |
| 22-29 years                     | 53 (44)                   |           | 18 (37)     |           | 89 (45)     |           | 40 (45)   |           | 158 (35)   |           | 21 (26)    |           |
| 30-39 years                     | 27 (22)                   |           | 15 (31)     |           | 39 (20)     |           | 19 (21)   |           | 171 (37)   |           | 21 (26)    |           |
| 40-49 years                     | 20 (17)                   |           | 8 (16)      |           | 10 (5)      |           | 6 (7)     |           | 85 (19)    |           | 32 (40)    |           |
| 50+ years                       | 10 (8)                    |           | 6 (12)      |           | 15 (8)      |           | <5 (<5)   |           | 24 (5)     |           | <5 (<5)    |           |
| <b>Gender identity</b>          |                           |           |             |           |             |           |           |           |            |           |            |           |
| Male                            | <5 (<5)                   |           | 0           |           | 6 (3)       |           | 0         |           | 5 (1)      |           | 0          |           |
| Female                          | 119 (98)                  |           | 49 (100)    |           | 192 (97)    |           | 89 (100)  |           | 449 (98)   |           | 79 (99)    |           |
| Other                           | 0                         |           | 0           |           | 0           |           | 0         |           | <5 (<5)    |           | <5 (<5)    |           |
| <b>ED diagnosis*</b>            |                           |           |             |           |             |           |           |           |            |           |            |           |
| Anorexia nervosa                | 79 (65)                   |           | 36 (74)     |           | 130 (66)    |           | 66 (74)   |           | 291 (64)   |           | 60 (75)    |           |
| Bulimia nervosa                 | 30 (25)                   |           | 8 (16)      |           | 40 (20)     |           | 17 (19)   |           | 178 (39)   |           | 29 (36)    |           |
| Binge-eating disorder           | 37 (31)                   |           | 11 (22)     |           | 20 (10)     |           | <5 (<5)   |           | 117 (26)   |           | 24 (30)    |           |
| Other                           | 71 (59)                   |           | 30 (61)     |           | 91 (46)     |           | 41 (46)   |           | 298 (65)   |           | 55 (69)    |           |
| <b>COVID-19 circumstances**</b> | <b>T1</b>                 | <b>T2</b> | <b>T1</b>   | <b>T2</b> | <b>T1</b>   | <b>T2</b> | <b>T1</b> | <b>T2</b> | <b>T1</b>  | <b>T2</b> | <b>T1</b>  | <b>T2</b> |
| Currently quarantined           | 48 (41)                   | <5 (<5)   | 20 (43)     | 0         | 32 (16)     | <5 (<5)   | 15 (17)   | 0         | 35 (8)     | 8 (2)     | 7 (9)      | <5 (<5)   |
| Working from home               | 78 (65)                   | 45 (38)   | 27 (56)     | 14 (26)   | 97 (49)     | 60 (30)   | 44 (49)   | 22 (25)   | 211 (46)   | 214 (47)  | 21 (26)    | 30 (38)   |
| Physical distancing             | 119 (99)                  | 99 (83)   | 47 (98)     | 42 (78)   | 194 (98)    | 164 (83)  | 87 (98)   | 73 (82)   | 362 (79)   | 335 (74)  | 67 (84)    | 58 (72)   |
| Has had COVID-19                | <5 (<5)                   | 6 (5)     | <5 (<5)     | 5 (10)    | <5 (<5)     | 12 (6)    | <5 (<5)   | 6 (7)     | 9 (2)      | 64 (14)   | <5 (<5)    | <5 (<5)   |
| Got 1 <sup>st</sup> vaccination | --                        | 90 (68)   | --          | 35 (65)   | --          | 40 (20)   | --        | 18 (20)   | --         | 87 (19)   | --         | 22 (28)   |

*Note:* Age, gender, and ED diagnosis were reported at T1. Percentages on available data are reported when data are missing. \*Percentages could sum to over 100% as individuals could select multiple options. \*\* US total n 130-132, NL total n 218-219; total n might deviate from the total included n because individuals could skip questions (US) or exit the survey prematurely (US, NL, SE)

Abbreviations: US, United States; NL, Netherlands; SE, Sweden; ED, eating disorder; SD, standard deviation

**Supplementary Figure 1.** COVID-19-related impact on eating disorder symptoms at both time points (group 1)

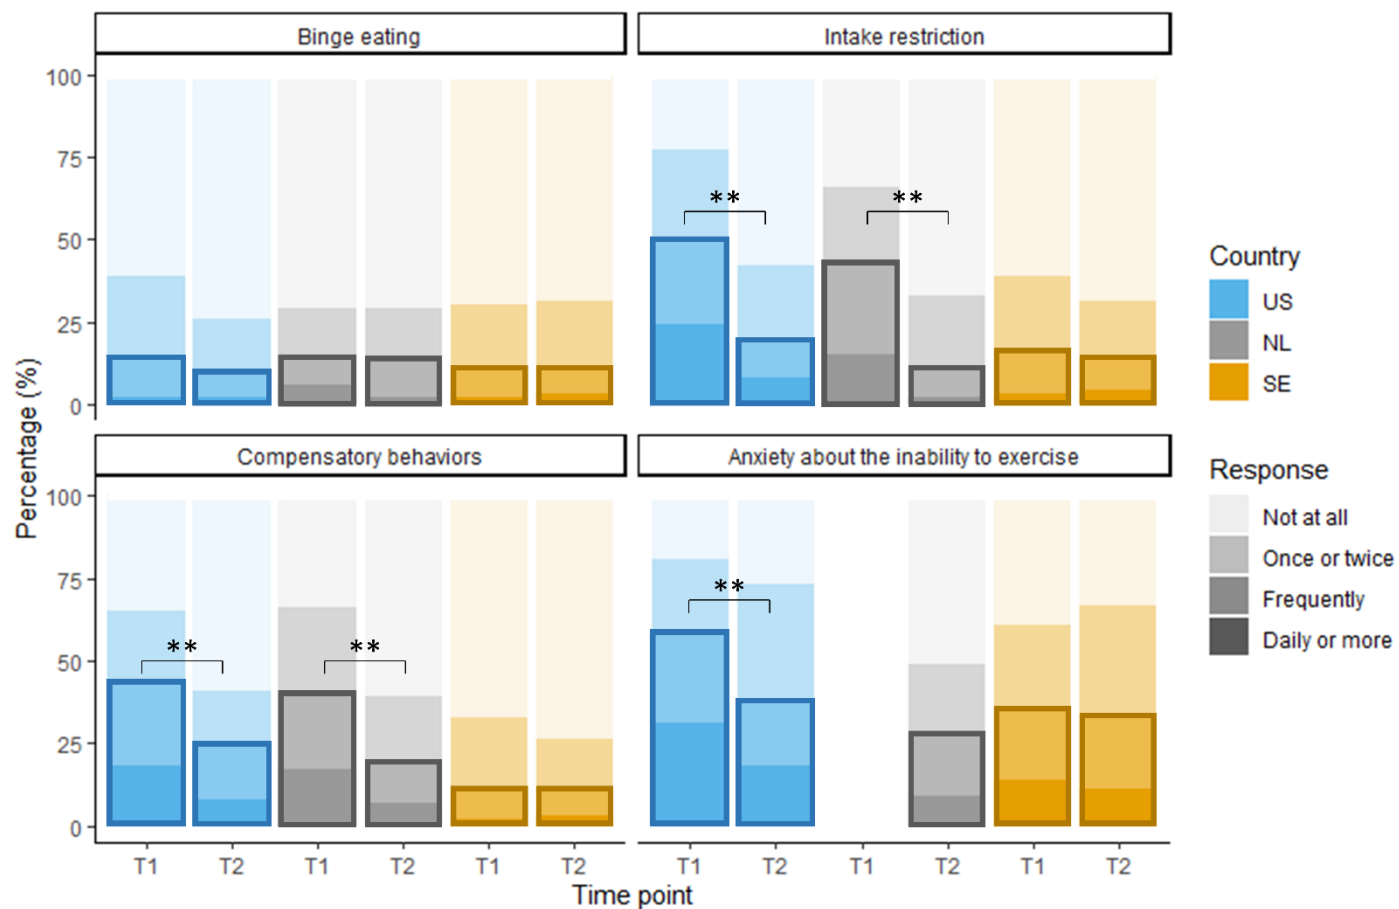

Note: boxes around part of the data represent response options “frequently” and “daily or more” which were grouped in the analyses. Data for NL T1 on the item “Anxiety about the inability to exercise” was, unintentionally, not asked. \*  $q < 0.05$ ; \*\*  $q < 0.001$  for McNemar tests. Abbreviations: US, United States; NL, Netherlands; SE, Sweden.

**Supplementary Figure 2.** Change in treatment access and quality since the start of the pandemic

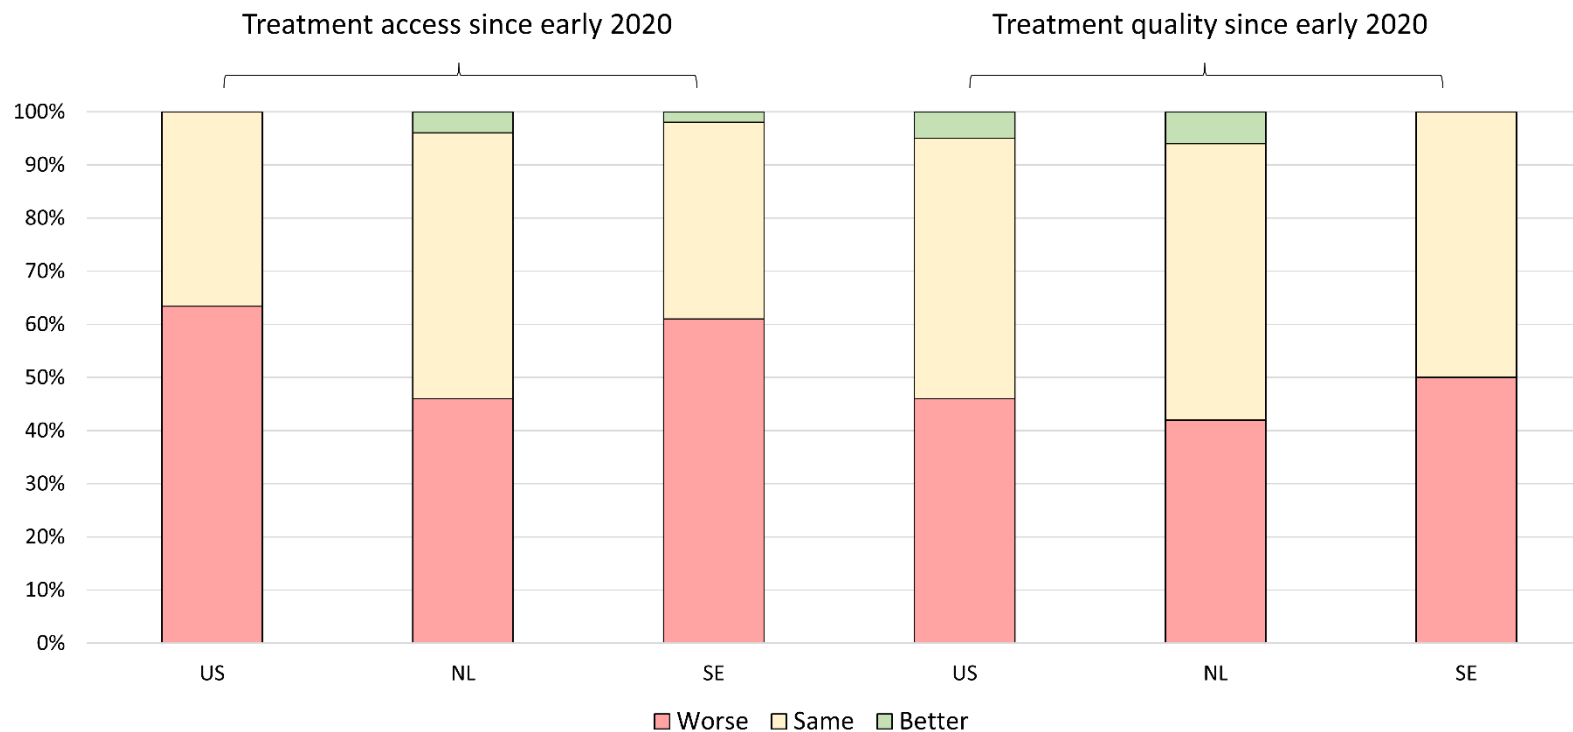

*Note:* Change in treatment access and quality since the start of the pandemic (group 1a) among those in treatment at T2.

Abbreviations: US, United States; NL, Netherlands; SE, Sweden.



**Supplementary Figure 3.** Changes in anxiety and depressive mood since the start of the pandemic reported at T2

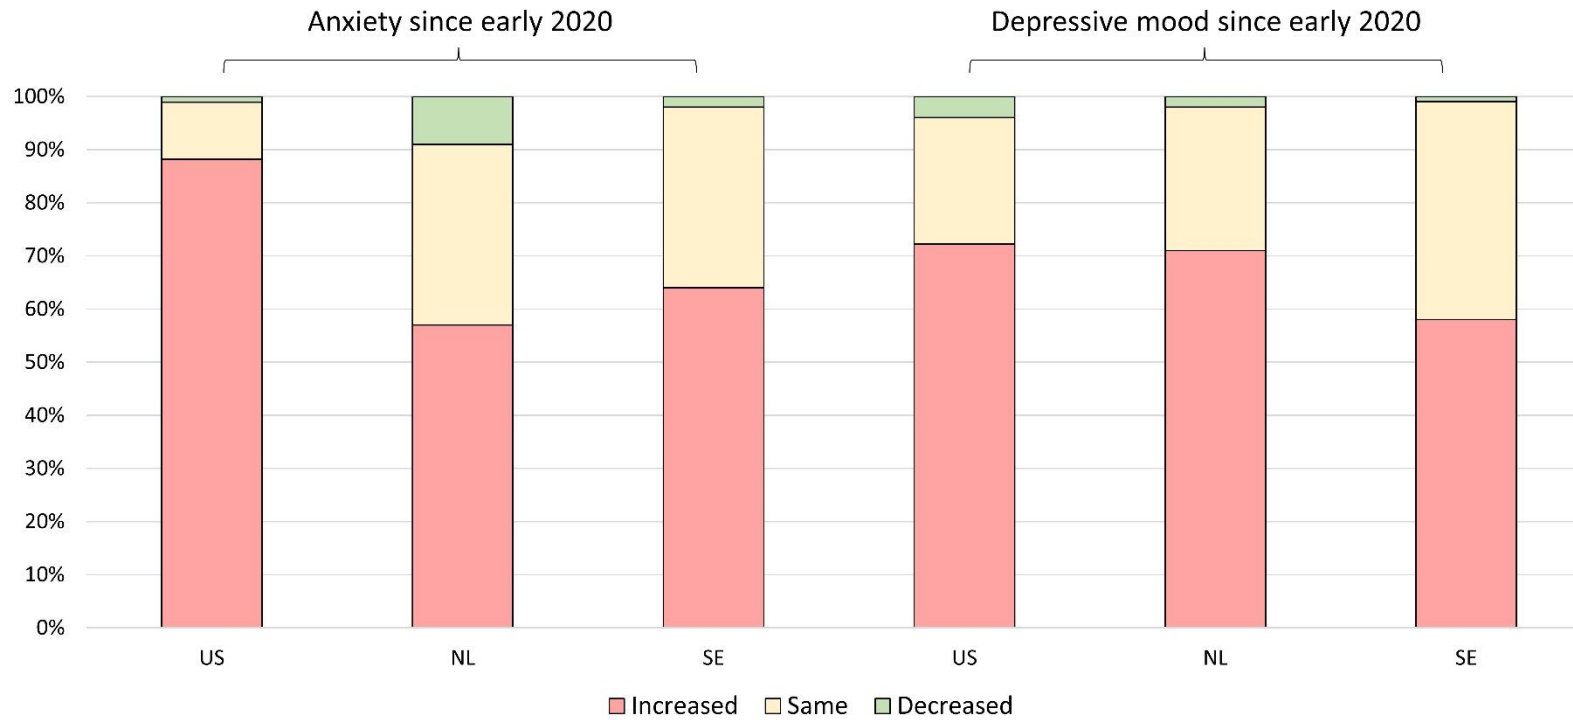

*Note:* Here we report descriptive statistics for group 1a.

Abbreviations: US, United States; NL, Netherlands; SE, Sweden.

**Appendix I.** A comprehensive list of all survey items across countries and time points

*Abbreviations:* US, United States; NL, Netherlands; SE, Sweden.

| Item                                       | Question                                                        | Response options                                                                                                                                                                              | Time points<br>(T1 / T2) | Country  |
|--------------------------------------------|-----------------------------------------------------------------|-----------------------------------------------------------------------------------------------------------------------------------------------------------------------------------------------|--------------------------|----------|
| <b>Demographics, employment, insurance</b> |                                                                 |                                                                                                                                                                                               |                          |          |
| age                                        | What is your current age in years?                              | US & SE: continuous;<br>NL: categories (16-21, 22-29, 30-39, 40-49, 50+)                                                                                                                      | T1                       | US/SE/NL |
| sex                                        | What was your biological sex at birth?                          | Male;<br>Female;<br>Intersex                                                                                                                                                                  | T1                       | US/SE/NL |
| gender                                     | What is your gender identity?                                   | Male;<br>Female;<br>Nonbinary;<br>Two-spirit;<br>Other                                                                                                                                        | T1                       | US/SE/NL |
| race                                       | What is your race?                                              | Asian;<br>Black or African American;<br>Native American or Alaska Native;<br>Native Hawaiian or Pacific Islander;<br>White;<br>More than one race;<br>Other                                   | T2                       | US       |
| ethnicity                                  | What is your ethnicity?                                         | Hispanic;<br>Non-Hispanic                                                                                                                                                                     | T2                       | US       |
| employment                                 | Are you currently employed?                                     | Yes, I work full time;<br>Yes, I work part time;<br>I am a student;<br>I am currently not employed                                                                                            | T2                       | US/SE/NL |
| Employ_change                              | Has your employment status changed as a result of the pandemic? | Yes, I lost my job due to the pandemic and have found another job;<br>Yes, I have transitioned to part time due to the pandemic;<br>Yes, I lost my job due to the pandemic and am unemployed; | T2                       | US/SE/NL |

|                                                                   |                                                                                                 |                                                                                                                                                                                                                                                                                                                                                                                                                                                                                                      |         |          |
|-------------------------------------------------------------------|-------------------------------------------------------------------------------------------------|------------------------------------------------------------------------------------------------------------------------------------------------------------------------------------------------------------------------------------------------------------------------------------------------------------------------------------------------------------------------------------------------------------------------------------------------------------------------------------------------------|---------|----------|
|                                                                   |                                                                                                 | No, there has been no change or the change was not due to the pandemic                                                                                                                                                                                                                                                                                                                                                                                                                               |         |          |
| income                                                            | Please indicate your annual <u>household</u> income.                                            | Free text.                                                                                                                                                                                                                                                                                                                                                                                                                                                                                           | T2      | US       |
| House_income_change                                               | Has your <u>household</u> income status changed as a result of the pandemic?                    | Yes, my income has increased;<br>Yes, my income has decreased;<br>No, there has been no change                                                                                                                                                                                                                                                                                                                                                                                                       | T2      | US/SE/NL |
| Person_income_change                                              | Has your <u>personal</u> income status changed as a result of the pandemic?                     | Yes, my income has increased;<br>Yes, my income has decreased;<br>No, there has been no change                                                                                                                                                                                                                                                                                                                                                                                                       | T2      | US/SE/NL |
| Health_ins                                                        | Do you currently have health insurance?                                                         | Yes;<br>No                                                                                                                                                                                                                                                                                                                                                                                                                                                                                           | T2      | US       |
| Health_ins12                                                      | Has there been a change in your health insurance in the past 12 months due to the pandemic?     | Yes, it changed but I still have coverage;<br>Yes, I have lost my health insurance coverage and am currently uninsured;<br>No;                                                                                                                                                                                                                                                                                                                                                                       | T2      | US       |
| <b>COVID-19: situational circumstances, exposure and symptoms</b> |                                                                                                 |                                                                                                                                                                                                                                                                                                                                                                                                                                                                                                      |         |          |
| distance                                                          | The following question relates to the COVID-19 (coronavirus) situation. Are you currently..?    | Quarantined;<br>physical distancing;<br>voluntary self-isolation;<br>mandatory self-isolation;<br>working from home;<br>shelter-in-place                                                                                                                                                                                                                                                                                                                                                             | T1 & T2 | US/SE/NL |
| Prof_contact                                                      | What types of contact have you had with COVID-19 patients professionally? Check all that apply. | I am a front-line healthcare worker with direct contact;<br>I am not a healthcare worker, but my work brings me in direct contact with COVID-19 patients in a healthcare setting;<br>I conduct telehealth care for individuals with COVID-19;<br>I conduct telehealth care for frontline providers;<br>My partner or a family member with whom I live has direct contact with COVID-19 patients;<br>I am unable to work from home and am in contact with potentially infected individuals regularly; | T2      | US/SE/NL |

|                 |                                                                                                                             |                                                                                                                                                       |         |          |
|-----------------|-----------------------------------------------------------------------------------------------------------------------------|-------------------------------------------------------------------------------------------------------------------------------------------------------|---------|----------|
|                 |                                                                                                                             | I do not have any professional contact with individuals with COVID-19 as far as I know.                                                               |         |          |
| Covid_ex<br>p   | During the past two weeks, have you been exposed to someone like to have COVID-19?                                          | Yes, with positive COVID-19 test;<br>Yes, with medical diagnosis;<br>Yes, but not diagnosed;<br>No;<br>Unknown/unsure.                                | T1 & T2 | US/SE/NL |
| Covid_fa<br>m   | Has anyone in your family been diagnosed with covid-19?                                                                     | Yes, member of household;<br>Yes, member who does not live with me;<br>No                                                                             | T1 & T2 | US/SE/NL |
| Covid_ev<br>ent | Multiple answers possible. "Have any of the following happened to your family members because of COVID-19?"                 | Become ill physically;<br>hospitalized;<br>isolated or put into quarantine;<br>lost job;<br>none of the above                                         | T1 & T2 | US/SE/NL |
| Covid_de<br>ath | Do you personally know anyone who has died (or possibly) died from COVID-19?                                                | Yes, family member;<br>Yes, friend;<br>Yes, acquaintance, neighbor, someone I know but am not close to;<br>No, no one in my immediate circle has died | T2      | US/SE/NL |
| Covid_sx<br>s   | Have you had any of the following symptoms in the past month? Please select all that apply.                                 | Fever;<br>Cough;<br>Shortness of breath;<br>Sore throat;<br>Fatigue;<br>Loss of taste or smell;<br>I have not had any of these symptoms               | T1 & T2 | US/SE/NL |
| Covid_dx        | Have <b>you</b> been diagnosed with COVID-19? <i>SE+NL+US T2: changed to "Have you been infected with the coronavirus?"</i> | Yes, positive COVID-19 test;<br>Yes, medical diagnosis;<br>Possibly, but I was not diagnosed or tested;<br>No                                         | T1 & T2 | US/SE/NL |
| Cov_sym<br>s    | <i>If Yes to covid_dx.</i> Which symptoms were the worst? Please select all that apply.                                     | Fever;<br>Cough;<br>shortness of breath;                                                                                                              | T2      | US/SE/NL |

|              |                                                                                                                               |                                                                                                                                     |    |          |
|--------------|-------------------------------------------------------------------------------------------------------------------------------|-------------------------------------------------------------------------------------------------------------------------------------|----|----------|
|              |                                                                                                                               | sore throat;<br>fatigue;<br>loss of taste or smell;<br>I had no symptoms;<br>other                                                  |    |          |
| hospital     | <i>If Yes to covid_dx.</i> Were you hospitalized for COVID-19?                                                                | Yes;<br>No                                                                                                                          | T2 | US/SE/NL |
| effects      | <i>If Yes to covid_dx.</i> Are you currently experiencing any symptoms of COVID-19?                                           | Yes;<br>No;<br>Don't know                                                                                                           | T2 | US/SE/NL |
| Long_haul    | <i>If Yes to covid_dx.</i> Have you had any long-term effects of COVID-19?                                                    | Yes, please explain;<br>No                                                                                                          | T2 |          |
| Covid_others | <i>If Yes to covid_dx.</i> Is there any other information you would like to share about your experience with having COVID-19? | <i>Free text.</i>                                                                                                                   | T2 | US/SE/NL |
| Vac_offer    | Have you been offered the COVID-19 vaccine?                                                                                   | Yes, and I have received the vaccine;<br>Yes, and I am scheduled to get it;<br>Yes, but I have declined the vaccine;<br>No, not yet | T2 | US/SE/NL |
| No_vac       | <i>If No to vac_offer.</i> Please tell us what factors led you to decline the vaccine.                                        | <i>Free text.</i>                                                                                                                   | T2 | US/SE/NL |
| Vac_info     | <i>If Yes, received to vac_offer.</i> Which COVID-19 vaccine did you get?                                                     | Pfizer-BioNTech;<br>Moderna;<br>Johnson & Johnson;<br>AstraZeneca;<br>Other;<br>Don't know                                          | T2 | US/SE/NL |
| Vac_date     | Date of first and second received vaccine.                                                                                    |                                                                                                                                     | T2 | US/SE/NL |

|                         |                                                                                                                        |                                                                                                                                                                                                                                                                                                                                              |         |          |
|-------------------------|------------------------------------------------------------------------------------------------------------------------|----------------------------------------------------------------------------------------------------------------------------------------------------------------------------------------------------------------------------------------------------------------------------------------------------------------------------------------------|---------|----------|
| Vac_effets_1 + 2        | Did you experience any side effects from the first vaccine? Check all that apply.                                      | Sore arm;<br>Anaphylaxis;<br>Fever;<br>Headache;<br>Body aches;<br>Nausea / vomiting;<br>Other, please describe;<br>I did not experience any side effects                                                                                                                                                                                    | T2      | US/SE/NL |
| <b>Eating disorders</b> |                                                                                                                        |                                                                                                                                                                                                                                                                                                                                              |         |          |
| Ed_dx                   | Which of the following eating disorders do you currently have or have you had in the past? Please mark all that apply. | Anorexia nervosa;<br>Bulimia nervosa;<br>Binge-eating disorder;<br>Avoidant restrictive food intake disorder (ARFID);<br>Atypical anorexia nervosa;<br>Purging disorder;<br>Night-eating syndrome;<br>Other specified feeding or eating disorder (OSFED or EDNOS);<br>Other ED;<br>Don't know/do not prefer to answer;<br>I never had an ED. | T1 & T2 | US/SE/NL |
| Ed_exp                  | Which of the following best describes your experience?                                                                 | I had an eating disorder in the past and have no current symptoms;<br>I had an eating disorder in the past and still have some lingering symptoms;<br>I currently have an eating disorder                                                                                                                                                    | T1 & T2 | US/SE/NL |
| Weight_change           | During the past year, have you experienced changes in your weight?                                                     | I gained weight;<br>I lost weight;<br>I both gained and lost weight (cycled);<br>I stayed about the same weight;<br>Prefer not to answer                                                                                                                                                                                                     | T2      | US/SE/NL |
| Wt_change_feel          | How do you feel about your weight change during the last year?                                                         | I am pleased with my weight change;<br>I am unhappy with my weight change;<br>I don't care either way;<br>Prefer not to answer                                                                                                                                                                                                               | T2      | US/SE/NL |

|               |                                                                                                            |                                                                                                 |         |          |
|---------------|------------------------------------------------------------------------------------------------------------|-------------------------------------------------------------------------------------------------|---------|----------|
| Wt_change_txt | Please explain your feelings about your weight change.                                                     | Free text.                                                                                      | T2      | US/SE/NL |
| concern       | <i>Please answer the following questions based on the past two weeks. I have been concerned about...</i>   | <i>Not at all concerned;<br/>Slightly concerned;<br/>Somewhat concerned;<br/>Very concerned</i> | T1 & T2 | US/SE/NL |
| Concern_1     | having access to enough food (e.g., unable to go to a grocery store regularly, unable to leave home, etc.) | “                                                                                               | “       | “        |
| Concern_2     | accessing foods that are consistent with my current meal plan/style of eating                              | “                                                                                               | “       | “        |
| Concern_3     | worsening of my eating disorder due to a lack of structure                                                 | “                                                                                               | “       | “        |
| Concern_4     | worsening of my eating disorder due to a lack of social support                                            | “                                                                                               | “       | “        |
| Concern_5     | worsening of my eating disorder due to increased time living in a triggering environment                   | “                                                                                               | “       | “        |
| Concern_6     | being able to afford the food I need for recovery due to loss of income related to COVID-19                | “                                                                                               | “       | “        |
| Concern_7     | Being able to afford eating disorder treatment due to loss of income related to COVID-19                   | “                                                                                               | “       | “        |
| ICB           | <i>Please answer the following questions based on the past two weeks. In the past two weeks, I have..</i>  | <i>Not at all;<br/>Once or twice;<br/>Frequently;<br/>Daily or more</i>                         | T1 & T2 | US/SE/NL |
| ICB_1         | binged on food that I (or my family or roommate) have stockpiled                                           | “                                                                                               | “       | “        |

|                  |                                                                                                                                                                      |                                                                                                                                                                                                           |         |                          |
|------------------|----------------------------------------------------------------------------------------------------------------------------------------------------------------------|-----------------------------------------------------------------------------------------------------------------------------------------------------------------------------------------------------------|---------|--------------------------|
| ICB_2            | restricted my intake more because of COVID-19-related factors                                                                                                        | “                                                                                                                                                                                                         | “       | “                        |
| ICB_3            | engaged in more compensatory behaviors (e.g., self-induced vomiting, excessive exercise, misuse of laxatives and/or water pills) because of COVID-19-related factors | “                                                                                                                                                                                                         | “       | “                        |
| ICB_4            | felt anxious about not being able to exercise                                                                                                                        | “                                                                                                                                                                                                         | “       | US / SE / [NL – only T2] |
| Good_change      | In the past two weeks, have you experienced any positive changes in your ED symptoms?                                                                                | Yes;<br>No                                                                                                                                                                                                | T1 & T2 | US/SE/NL                 |
| Good_change_txt  | <i>If Yes to good_change.</i> Please describe these positive changes in your ED symptoms.                                                                            | Free text.                                                                                                                                                                                                | T1 & T2 | US/SE/NL                 |
| Bad_change       | In the past two weeks, have you experienced any negative changes in your ED symptoms?                                                                                | Yes;<br>No                                                                                                                                                                                                | T2      | US/SE/NL                 |
| Bad_change_txt   | <i>If Yes to neg_change.</i> Please describe those negative changes in your ED symptoms.                                                                             | Free text                                                                                                                                                                                                 | T2      | US/SE/NL                 |
| Oth_concern      | In the past two weeks, what other ED-related concerns have you had that are not listed above?                                                                        | Free text                                                                                                                                                                                                 | T1 & T2 | US/SE/NL                 |
| ED_gen_change    | Do you feel that your ED symptoms have changed since the pandemic began in early spring of 2020?                                                                     | Yes, they have gotten worse;<br>Yes, they have gotten better;<br>No, they have stayed about the same                                                                                                      | T2      | US/SE/NL                 |
| <b>Treatment</b> |                                                                                                                                                                      |                                                                                                                                                                                                           |         |                          |
| treatment        | Choose the alternative that best characterizes your situation during the past two weeks. In the last two weeks:                                                      | I have had face-to-face (in person) interactions with my eating disorders treatment provider(s);<br>I have transitioned to online care with my eating disorders treatment provider(s) (i.e., telehealth); | T1 & T2 | US/SE/NL                 |



|                   |                                                                                                                                              |                                                                                                                                                                                     |         |          |
|-------------------|----------------------------------------------------------------------------------------------------------------------------------------------|-------------------------------------------------------------------------------------------------------------------------------------------------------------------------------------|---------|----------|
|                   |                                                                                                                                              | I have not been able to engage with my ED treatment provider(s) at all;<br>I do not currently receive ED treatment                                                                  |         |          |
| Trt_sessions      | <i>If option 1 or 2 in item treatment.</i> In the last two weeks:                                                                            | I have had to reduce the number of sessions/contacts with my ED treatment provider(s);<br>I have had at least the same number of sessions/contacts with my ED treatment provider(s) | T1 & T2 | US/SE/NL |
| Trt_quality       | <i>If option 1 or 2 in item treatment.</i> The quality of my treatment in the past two weeks has been..                                      | Better than usual;<br>As good as usual;<br>Somewhat worse than usual;<br>Much worse than usual                                                                                      | T1 & T2 | US/SE/NL |
| Trt_need          | In the last two weeks, what have been your greatest needs with regard to ED treatment or support?                                            | Free text.                                                                                                                                                                          | T1 & T2 | US/SE/NL |
| Trt_access2020    | Do you feel that your access to ED treatment has changed since the pandemic began in early spring 2020?                                      | Yes, it has gotten worse;<br>Yes, it has gotten better;<br>No, it has stayed about the same;<br>I have not been treatment over the past year                                        | T2      | US/SE/NL |
| Trt_quality2020   | Do you feel that the quality of your ED treatment has changed since the pandemic began in early spring of 2020?                              | Yes, it has gotten worse;<br>Yes, it has gotten better;<br>No, it has stayed about the same;<br>I have not been treatment over the past year                                        | T2      | US/SE/NL |
| <b>Well-being</b> |                                                                                                                                              |                                                                                                                                                                                     |         |          |
| anx2019           | Do you think your anxiety levels have changed since the end of 2019?                                                                         | Yes – my anxiety levels have increased;<br>Yes – my anxiety levels have decreased;<br>No                                                                                            | T1      | US/SE/NL |
| anx2020           | Do you think your anxiety levels have changed since the pandemic began in early spring of 2020?                                              | Yes – my anxiety levels have increased;<br>Yes – my anxiety levels have decreased;<br>No                                                                                            | T2      | US/SE/NL |
| Anx_covid         | <i>If Yes – increased to anx2019 (T1) or anx2020 (T2).</i> How much do you think these changes in anxiety are due to the COVID-19 situation? | Not at all;<br>Somewhat;<br>A lot                                                                                                                                                   | T1 & T2 | US/SE/NL |

|               |                                                                                                                    |                                                                                                                                                                                                                                                            |                    |                 |
|---------------|--------------------------------------------------------------------------------------------------------------------|------------------------------------------------------------------------------------------------------------------------------------------------------------------------------------------------------------------------------------------------------------|--------------------|-----------------|
| dep2020       | Do you think that you have felt more down, depressed or hopeless since the pandemic began in early spring of 2020? | Yes, I have felt more down, depressed or hopeless since the pandemic began;<br>No, I have felt less down, depressed or hopeless since the pandemic began;<br>No, my mood has stayed about the same                                                         | T2                 | US/SE/NL        |
| Dep_covid     | <i>If Yes, more to dep2020.</i> How much do you think these changes are due to the COVID-19 situation?             | Not at all;<br>Somewhat;<br>A lot                                                                                                                                                                                                                          | T2                 | US/SE/NL        |
| sleep         | Over the past year, have you had problems with sleep? Please select all that apply.                                | I have had period of insomnia, either not being able to fall asleep or not being able to stay asleep;<br>I have had periods when I was sleeping too much;<br>My sleep patterns have not changed much;<br>I have had anxiety dreams related to the pandemic | T2                 | US/SE/NL        |
| Covid_worry   | <i>Four 7-point Likert scales. How worried are you...</i>                                                          | <i>Not worried at all (1);<br/>Somewhat worried (4);<br/>Very worried (7)</i>                                                                                                                                                                              | <i>T1 &amp; T2</i> | <i>US/SE/NL</i> |
| Covid_worry_1 | ... about being infected yourself?                                                                                 | "                                                                                                                                                                                                                                                          | "                  | "               |
| Covid_worry_2 | ... about others being infected?                                                                                   | "                                                                                                                                                                                                                                                          | "                  | "               |
| Covid_worry_3 | .... that your physical health could be influenced by COVID-19?                                                    | "                                                                                                                                                                                                                                                          | "                  | "               |
| Covid_worry_4 | ... that your mental health could be influenced by COVID-19?                                                       | "                                                                                                                                                                                                                                                          | "                  | "               |
| Covid_thought | How much of your day are you thinking about COVID-19? [7-point Likert scale]                                       | Not at all (1);<br>About half the day (4);<br>All day long (7)                                                                                                                                                                                             | T1 & T2            | US/SE/NL        |
| Covid_pos     | Has the COVID-19 situation led to any positive changes in your life? [7-point Likert scale]                        | Not at all (1);<br>Some positive changes (4);<br>Several positive changes (7)                                                                                                                                                                              | T1 & T2            | US/SE/NL        |
| Covid_pos_txt | <i>If 2 or higher on covid_pos.</i> Please describe.                                                               | Free text.                                                                                                                                                                                                                                                 | T1 & T2            | US/SE/NL        |

|               |                                                                                                                                                         |                                                                                        |                    |                 |
|---------------|---------------------------------------------------------------------------------------------------------------------------------------------------------|----------------------------------------------------------------------------------------|--------------------|-----------------|
| Covid_neg     | Has the COVID-19 situation led to any negative changes in your life? [7-point Likert scale]                                                             |                                                                                        | T2                 | US/SE/NL        |
| Covid_neg_txt | <i>If 2 or higher on covid_neg. Please describe.</i>                                                                                                    | Free text.                                                                             | T2                 | US/SE/NL        |
| gad7          | <i>7 items. Over the last 2 weeks, how often have you been bothered by the following problems?</i>                                                      | <i>Not at all;<br/>Several days;<br/>Over half the days;<br/>Nearly every day</i>      | <i>T1 &amp; T2</i> | <i>US/SE/NL</i> |
| Gad7_1        | Feeling nervous, anxious or on edge                                                                                                                     | “                                                                                      | “                  | “               |
| Gad7_2        | Not being able to stop or control worrying                                                                                                              | “                                                                                      | “                  | “               |
| Gad7_3        | Worrying too much about different things                                                                                                                | “                                                                                      | “                  | “               |
| Gad7_4        | Trouble relaxing                                                                                                                                        | “                                                                                      | “                  | “               |
| Gad7_5        | Being so restless that it's hard to sit still                                                                                                           | “                                                                                      | “                  | “               |
| Gad7_6        | Becoming easily annoyed or irritable                                                                                                                    | “                                                                                      | “                  | “               |
| Gad7_7        | Feeling afraid as if something awful might happen                                                                                                       | “                                                                                      | “                  | “               |
| Anx_impact    | If you checked off any problems, how difficult have these made it for you to do your work, take care of things at home, or get along with other people? | Not difficult at all;<br>Somewhat difficult;<br>Very difficult;<br>Extremely difficult | T1 & T2            | US/SE/NL        |
